# Supplementary material for: Spatiotemporal Analysis of Extreme Rainfall Frequency in the Northeast Region of Brazil
Source: MDPI journal article supplement (doi:10.3390/atmos14030531), 2023-03-09
Supplement: s1 [file s1]

Archive with 1 entries (1 files):
- atmosphere-2210618-supplementary.pdf
