# Supplementary material for: Spatiotemporal Analysis of Extreme Rainfall Frequency in the Northeast Region of Brazil
Source: MDPI journal article supplement (doi:10.3390/atmos14030531), 2023-03-09
Supplement: s1 [file s1 › atmosphere-2210618-supplementary.pdf]

# Spatiotemporal Analysis of Extreme Rainfall Frequency in the Northeast Region of Brazil

Fidel Ernesto Castro Morales <sup>1,\*</sup>, Daniele Torres Rodrigues <sup>2,3</sup>, Thiago Valentim Marques <sup>4</sup>, Ana Cleide Bezerra Amorim <sup>5</sup>, Priscilla Teles de Oliveira <sup>6</sup>, Claudio Moises Santos e Silva <sup>3</sup>, Weber Andrade Gonçalves <sup>3</sup> and Paulo Sergio Lucio <sup>3</sup>

NC subregion

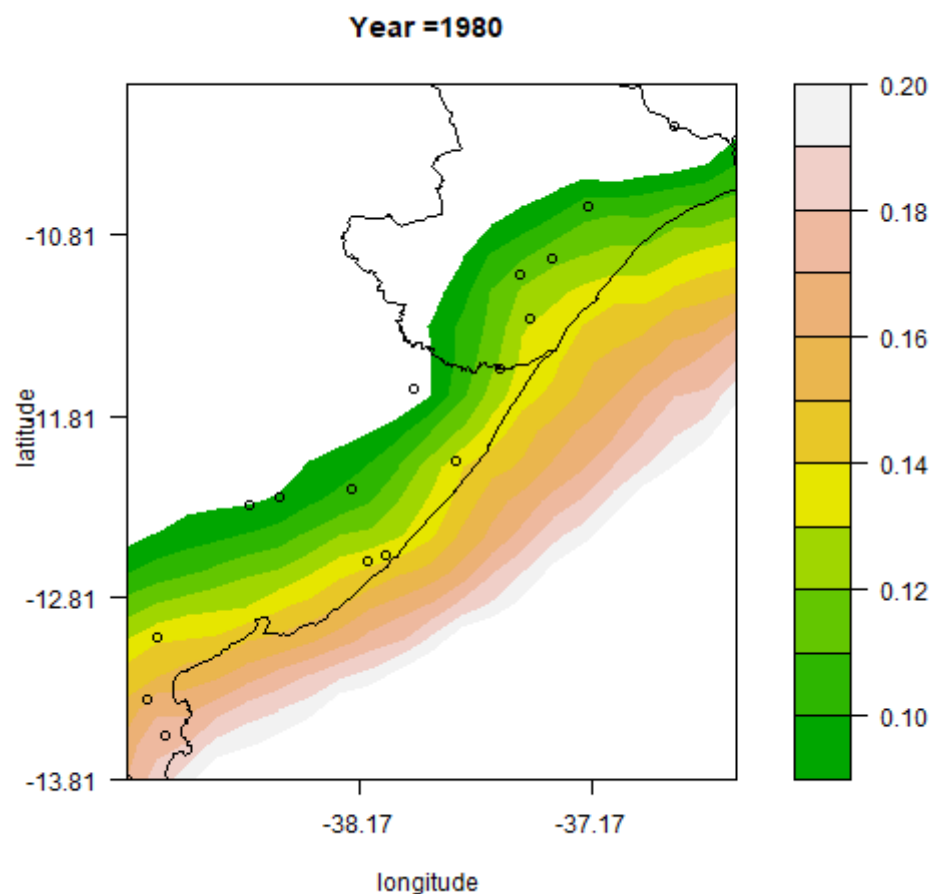

**Figure S1.** meanNC10mm.gif: Animation of surface estimated for R10mm index in the NC subregion in the years 1980 to 2010.

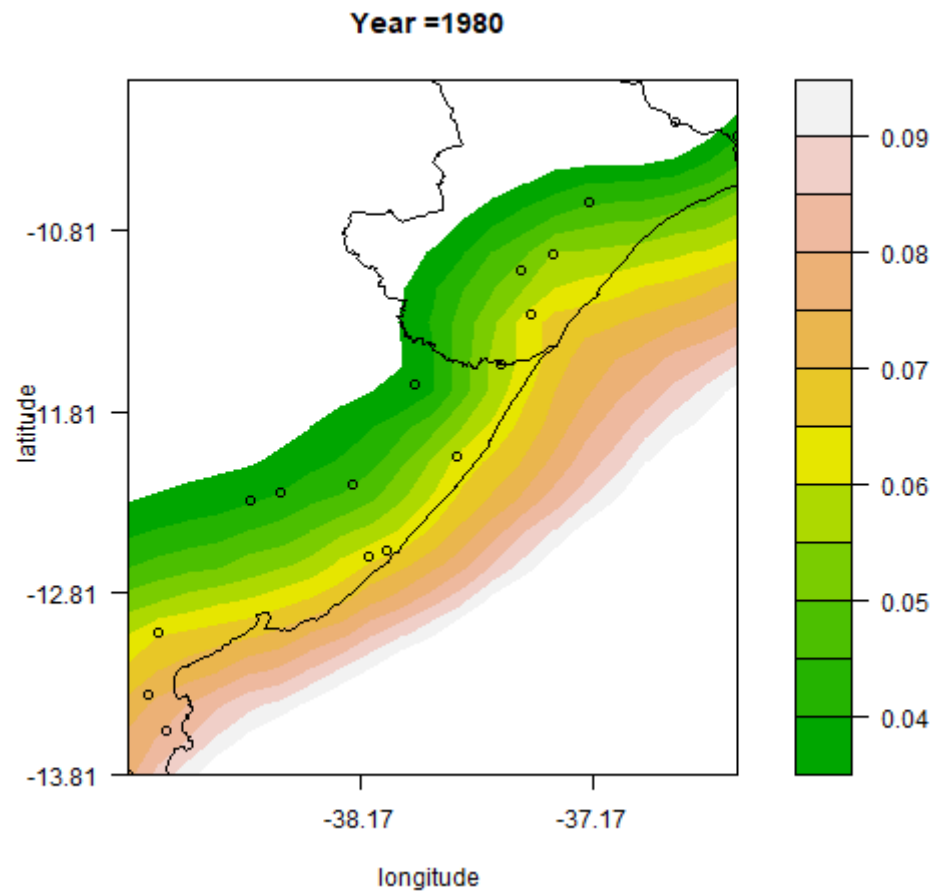

**Figure S2.** meanNC20mm.gif: Animation of surface estimated for R20mm index in the NC subregion in the years 1980 to 2010.

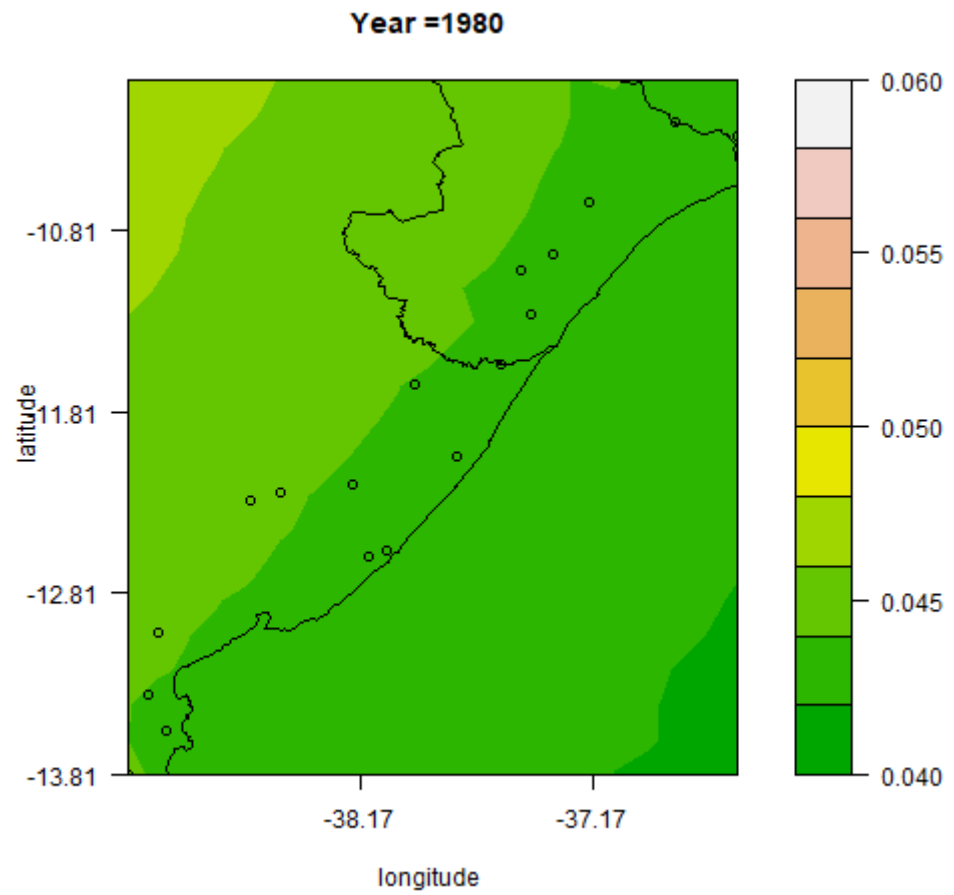

**Figure S3.** meanNC95p.gif: Animation of surface estimated for  $R^*$  index in the NC subregion in the years 1980 to 2010.

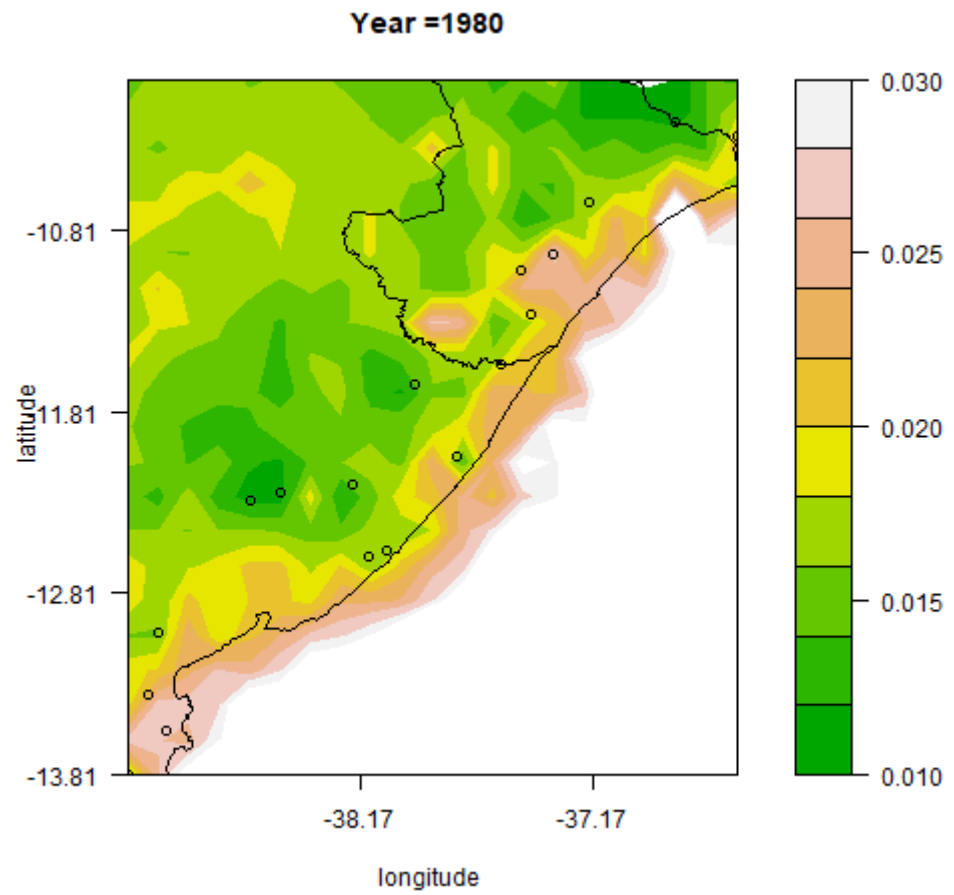

**Figure S4.** Scheme 10. mm.gif: Animation of surface estimated for the standard deviation of R10mm index in the NC subregion in the years 1980 to 2010.

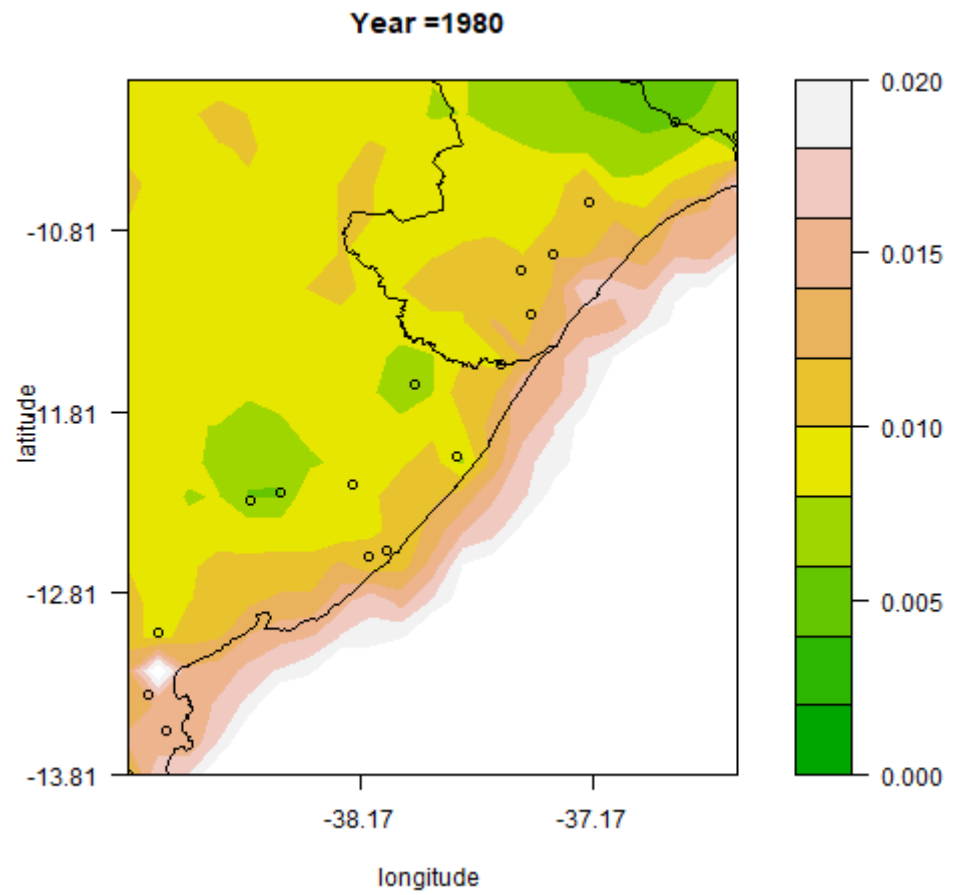

**Figure S5.** Scheme 20. mm.gif: Animation of surface estimated for the standard deviation of R20mm index in the NC subregion in the years 1980 to 2010.

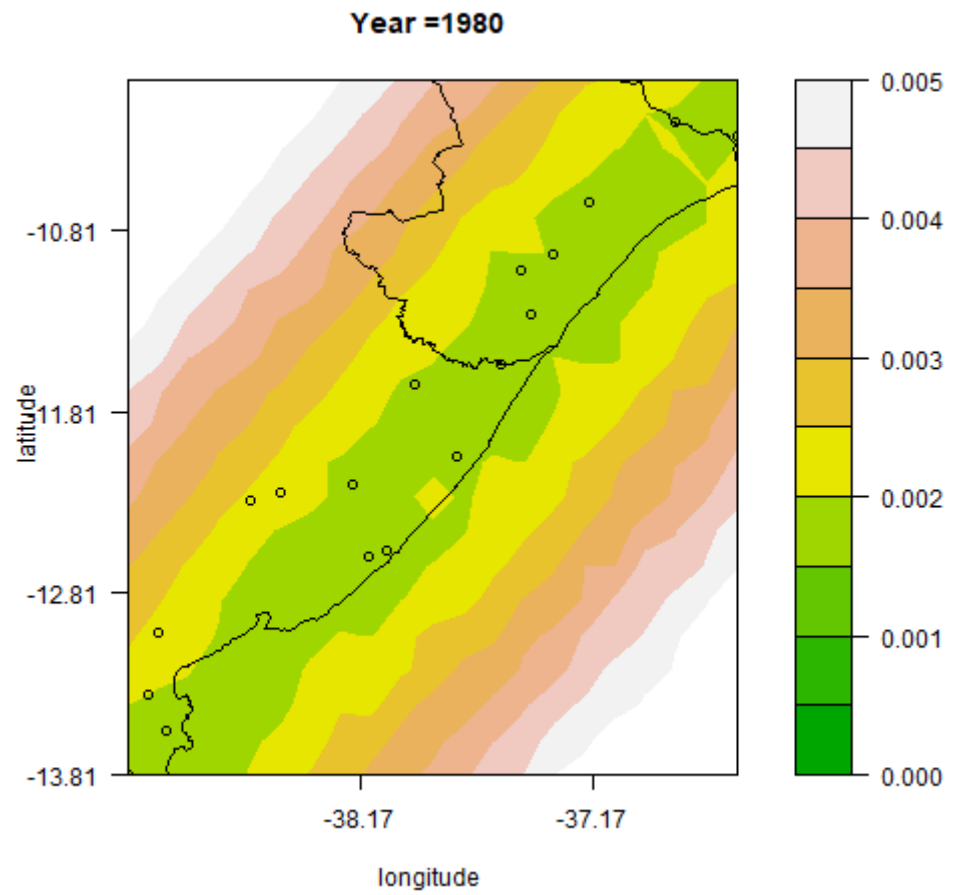

**Figure S6.** Scheme 95. p.gif: Animation of surface estimated for the standard deviation of  $R^*$  index in the NC subregion in the years 1980 to 2010.

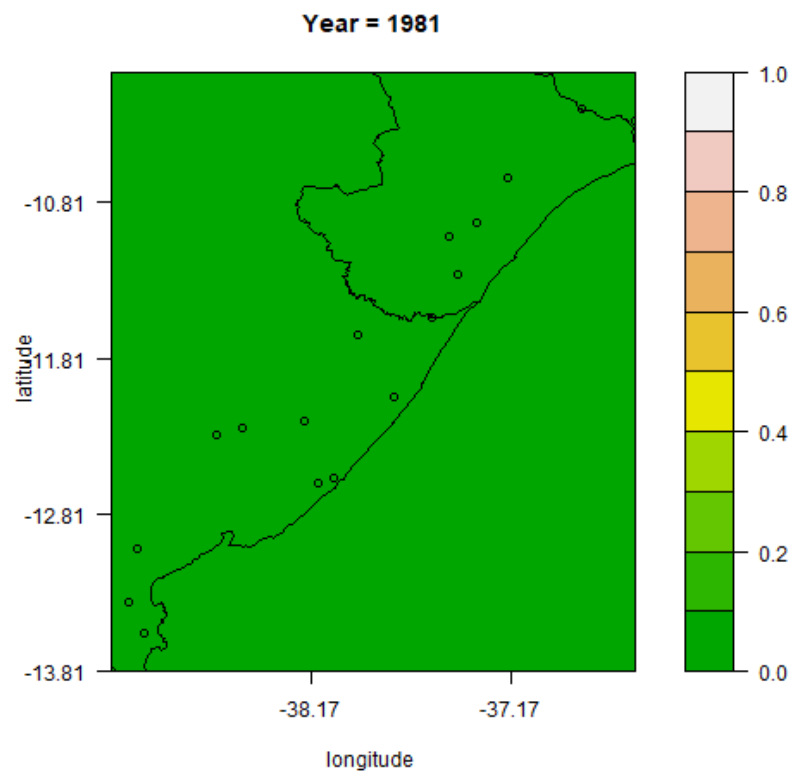

**Figure S7.** INTNC95p.gif: Hypothesis testing:  $H_0: R^*(s)=0.05$  against  $H_1: R^*(s) \neq 0.05$ , for any  $s$  in the subregion NC. Let  $I(s)=1$  if we reject  $H_0$  and  $I(s)=0$  in any other case. In this file, we show the animation of surface estimated for  $I$  in the NC subregion in the years 1980 to 2010.

### NS subregion

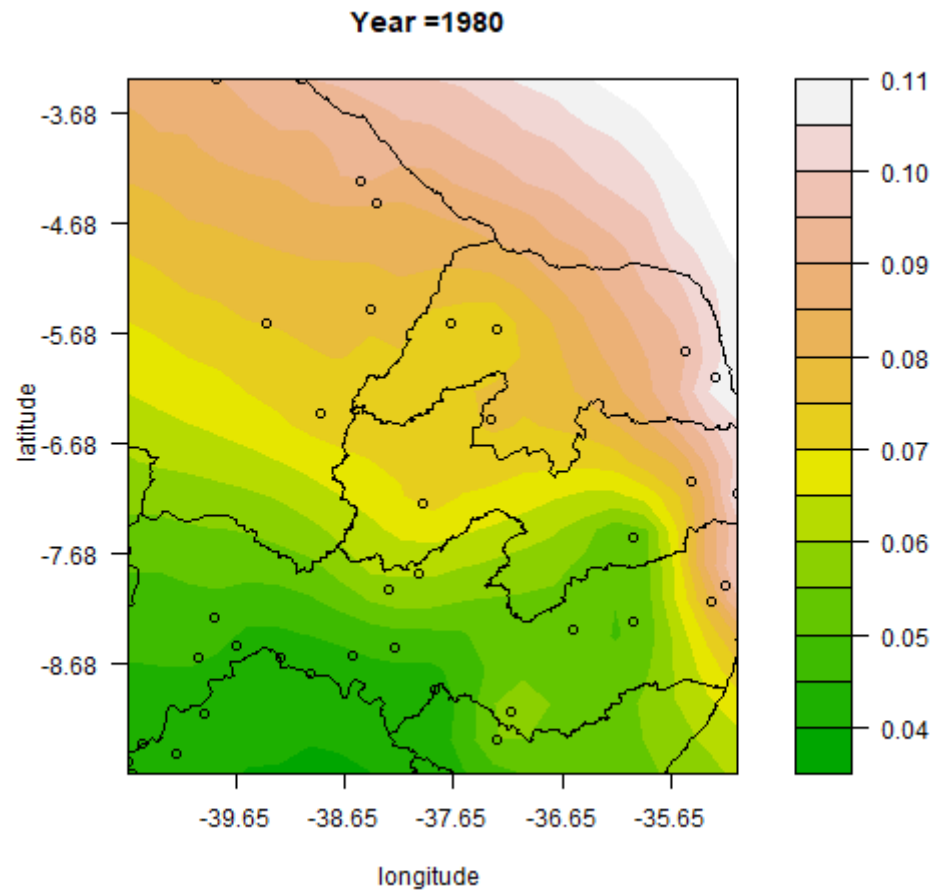

**Figure S8.** meanNS10mm.gif: Animation of surface estimated for R10mm index in the NS subregion in the years 1980 to 2010.

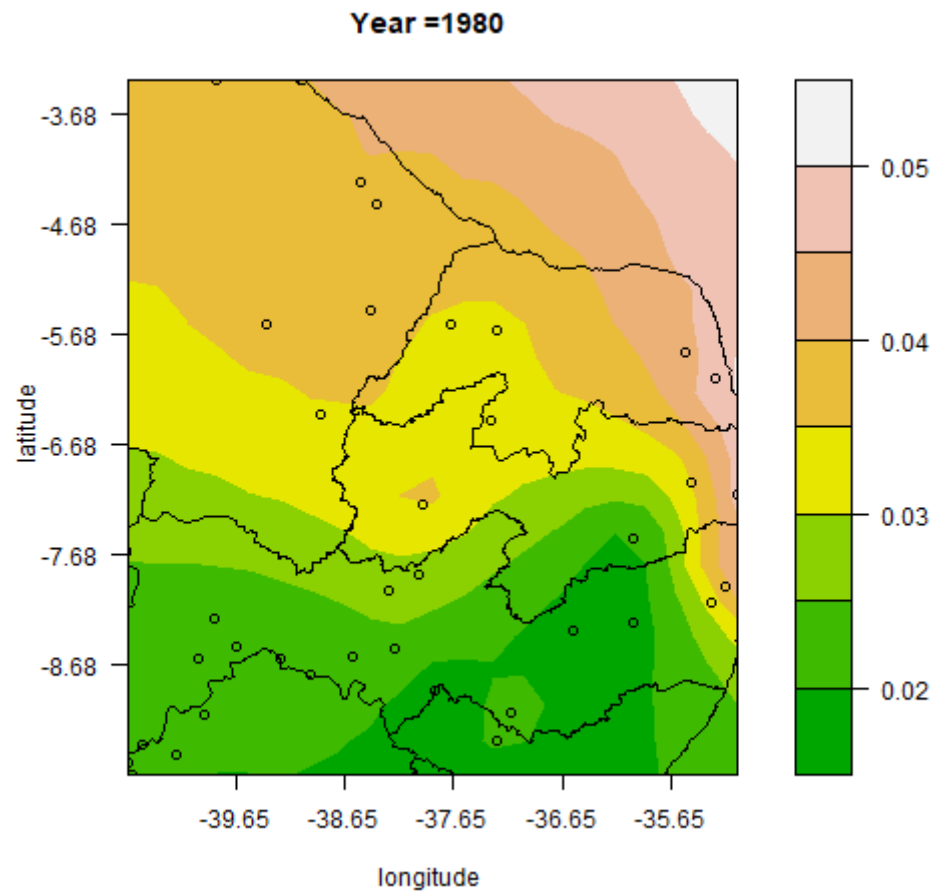

**Figure S9. meanNS20mm.gif:** Animation of surface estimated for R20mm index in the NS subregion in the years 1980 to 2010.

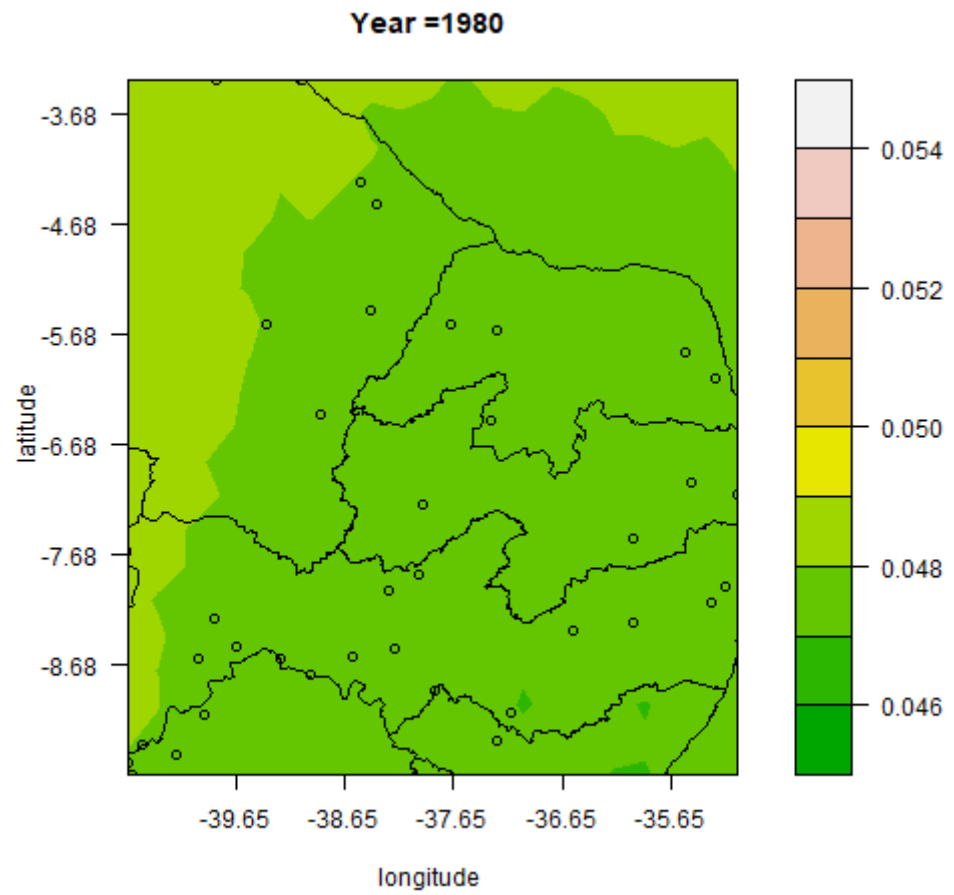

**Figure S10. meanNS95p.gif:** Animation of surface estimated for  $R^*$  index in the NS subregion in the years 1980 to 2010.

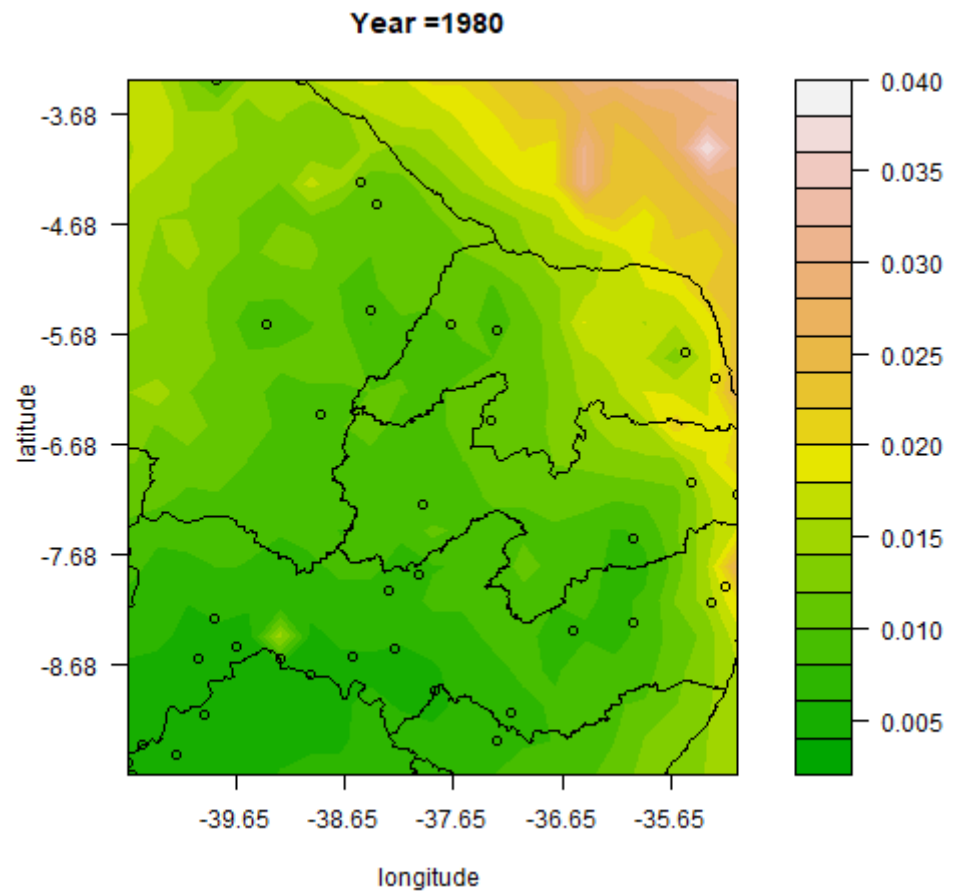

**Figure S11. SDNS10mm.gif:** Animation of surface estimated for the standard deviation of R10mm index in the NS subregion in the years 1980 to 2010.

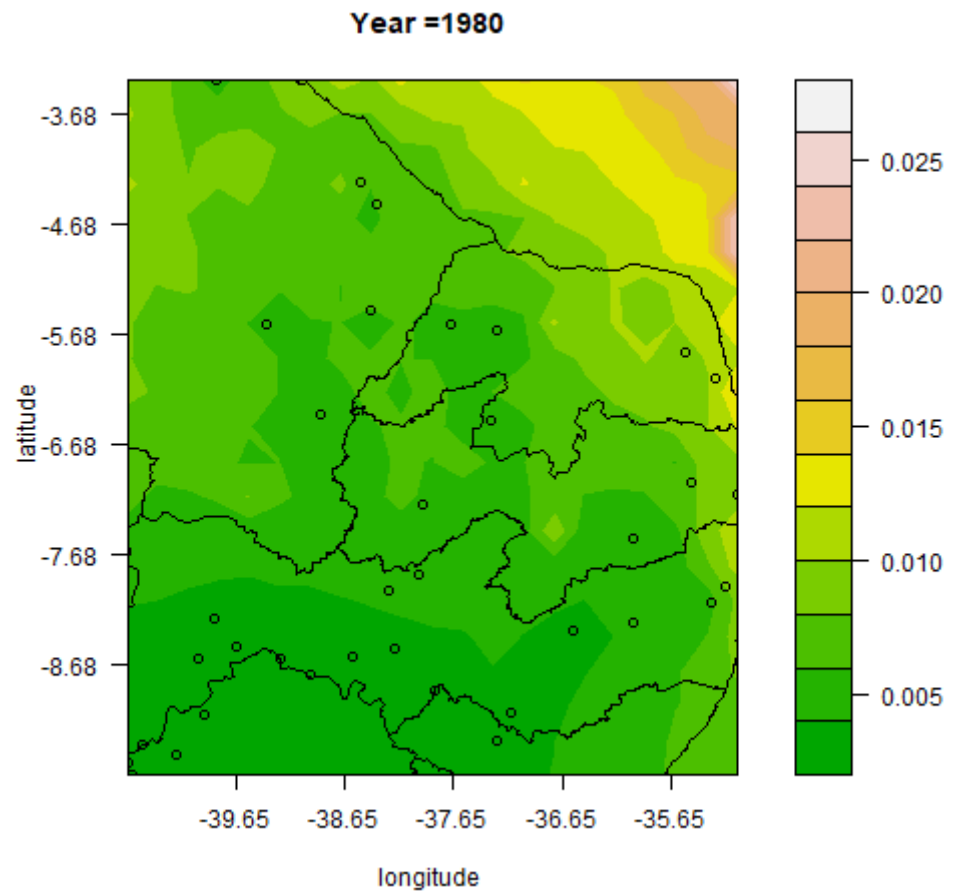

**Figure S11. SDNS20mm.gif:** Animation of surface estimated for the standard deviation of R20mm index in the NS subregion in the years 1980 to 2010.

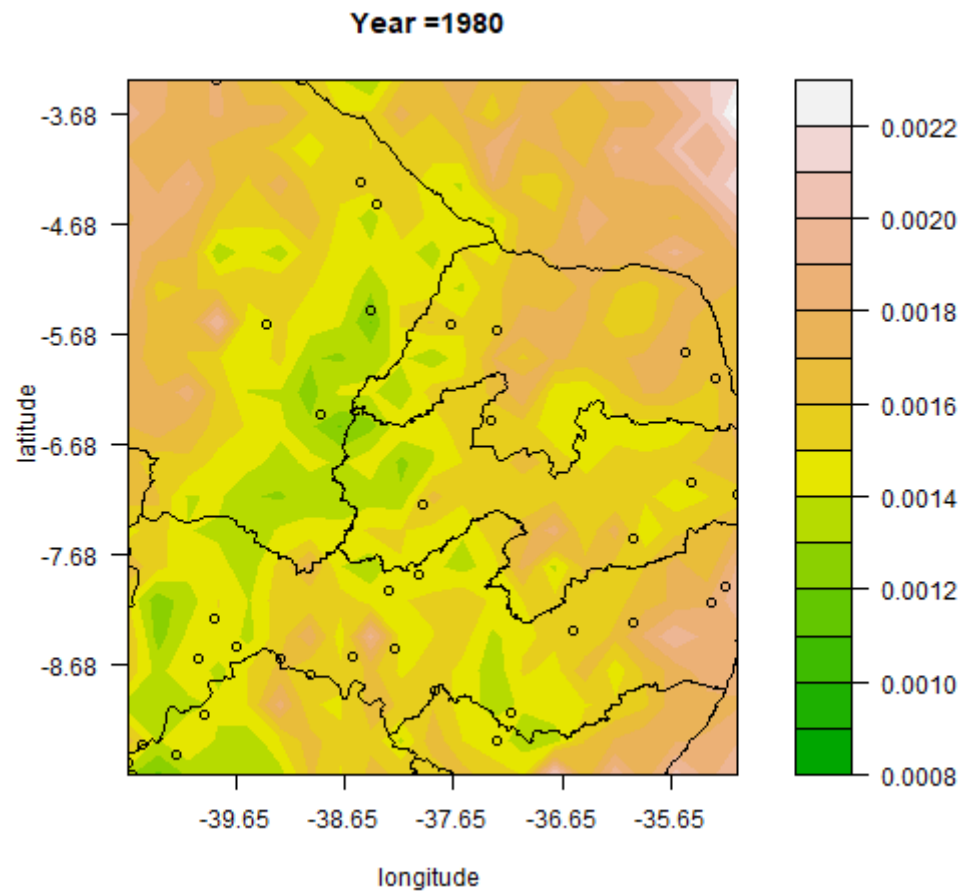

**Figure S12.** SDNS95p.gif: Animation of surface estimated for the standard deviation of  $R^*$  index in the NS subregion in the years 1980 to 2010.

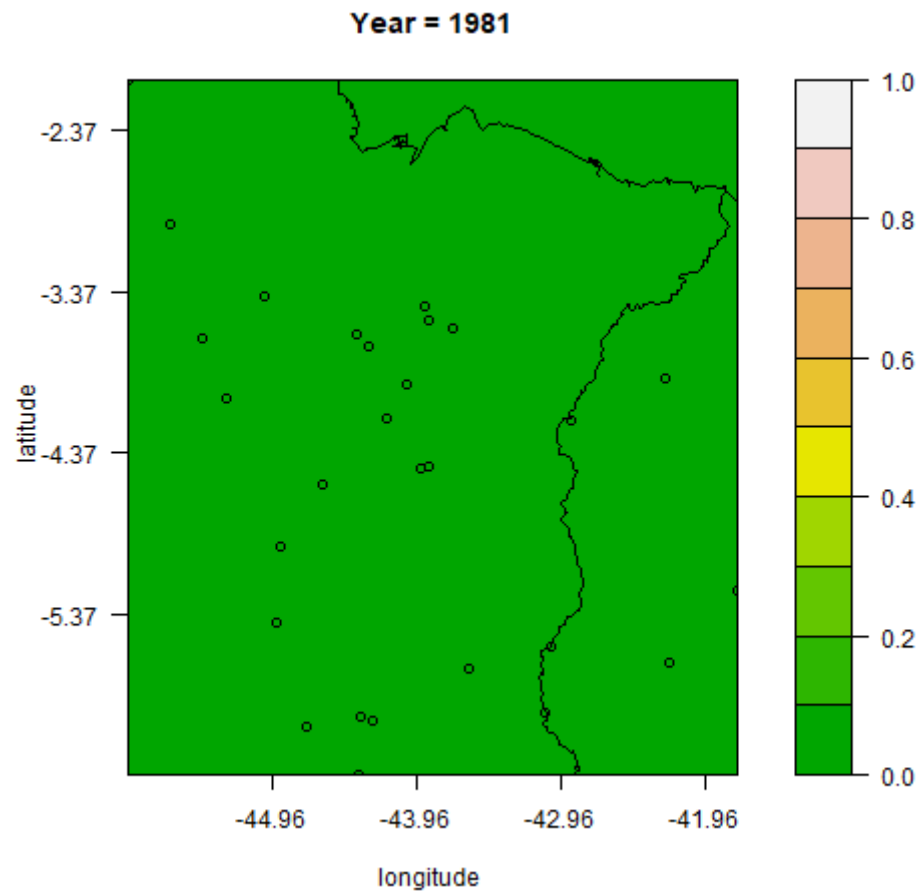

**Figure S13.** INTNS95p.gif: Hypothesis testing:  $H_0: R^*(s)=0.05$  against  $H_1: R^*(s) \neq 0.05$ , for any  $s$  in the subregion NS. Let  $I(s)=1$  if we reject  $H_0$  and  $I(s)=0$  in any other case. In this file, we show the animation of surface estimated for  $I$  in the NS subregion in the years 1980 to 2010.

**NO subregion**

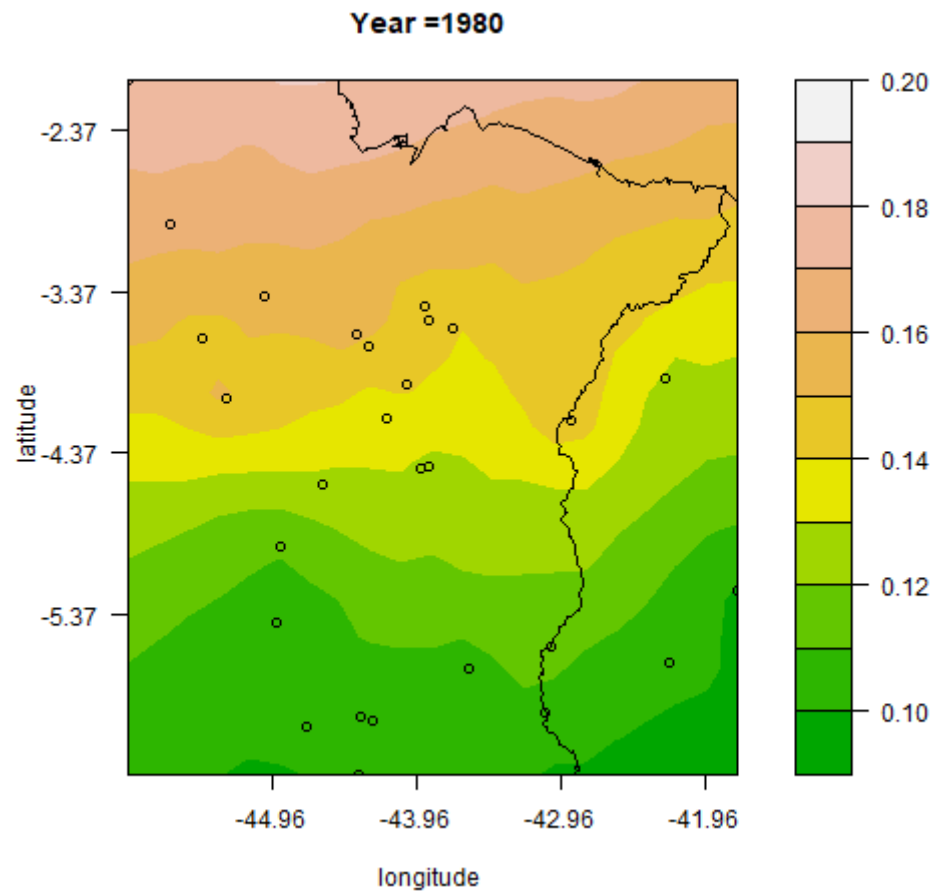

**Figure S14. meanNO10mm.gif:** Animation of surface estimated for R10mm index in the NO subregion in the years 1980 to 2010.

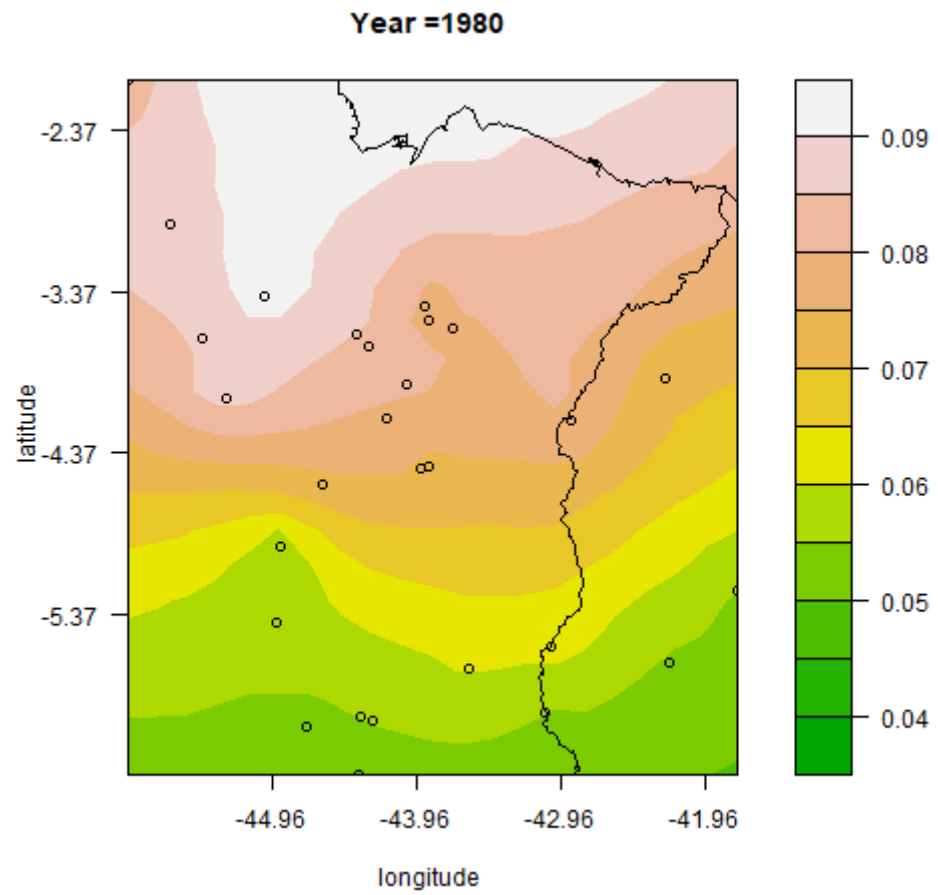

**Figure S15.** meanNO20mm.gif: Animation of surface estimated for R20mm index in the NO subregion in the years 1980 to 2010.

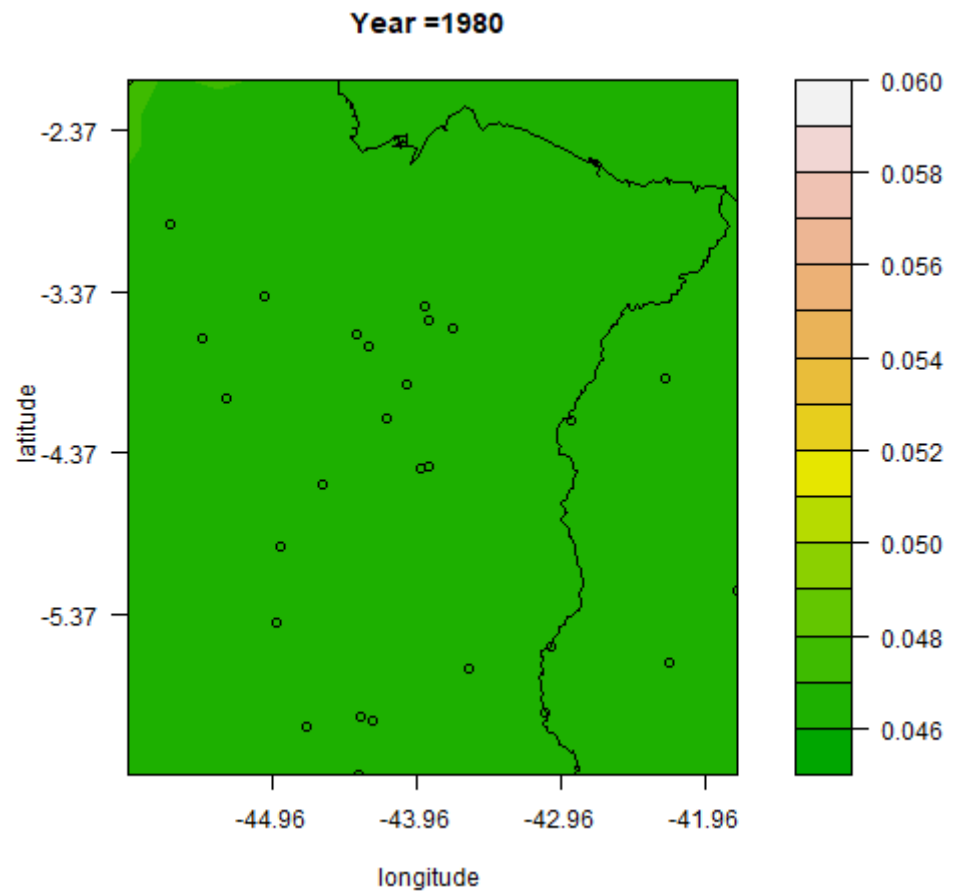

**Figure S16.** meanNO95p.gif: Animation of surface estimated for  $R^*$  index in the NO subregion in the years 1980 to 2010.

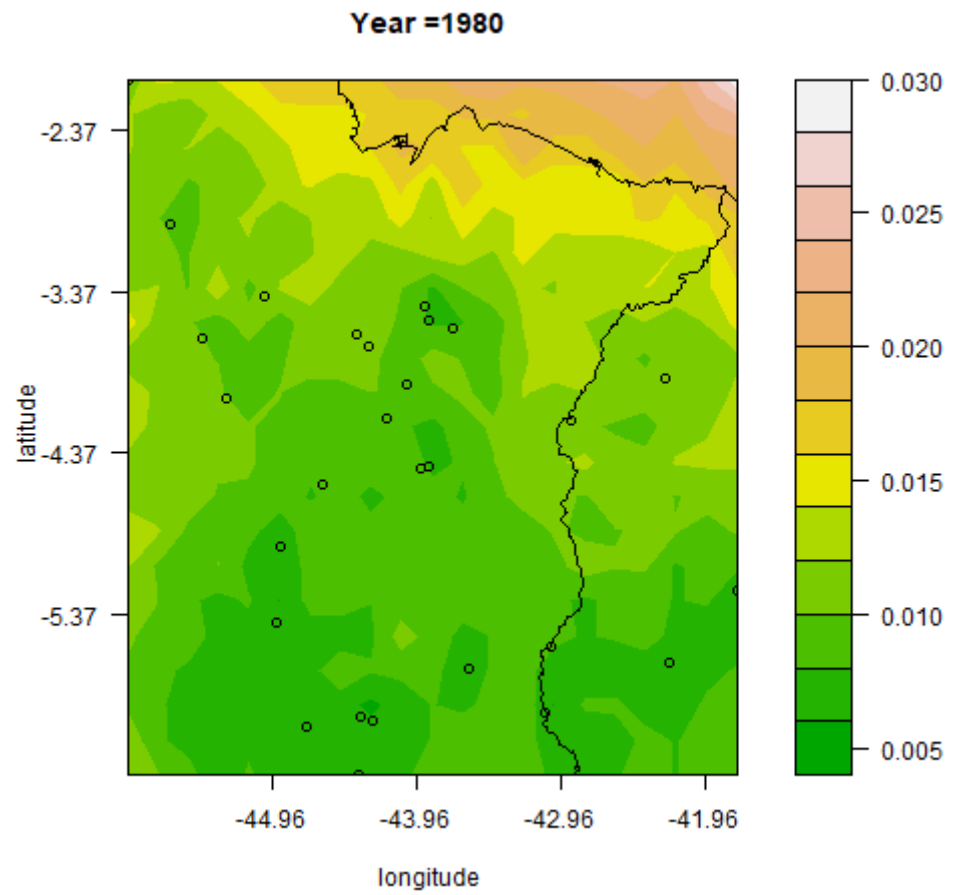

**Figure S17. SDNO10mm.gif:** Animation of surface estimated for the standard deviation of R10mm index in the NO subregion in the years 1980 to 2010.

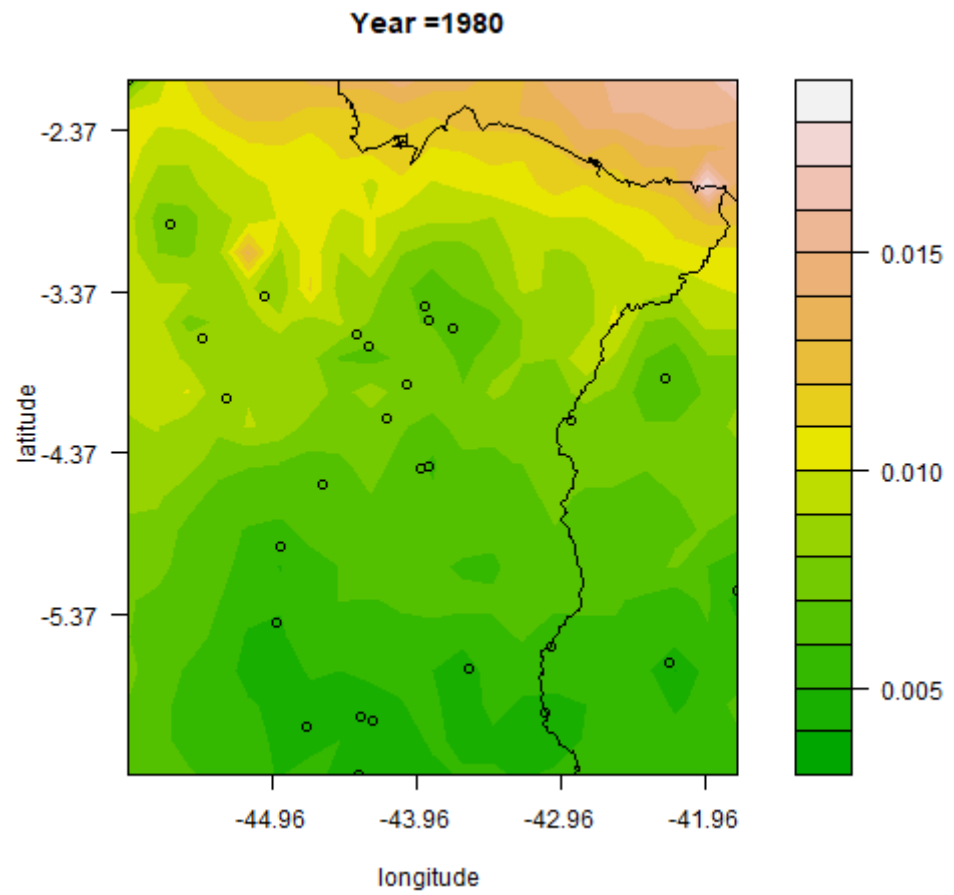

**Figure S18. SDNO20mm.gif:** Animation of surface estimated for the standard deviation of R20mm index in the NO subregion in the years 1980 to 2010.

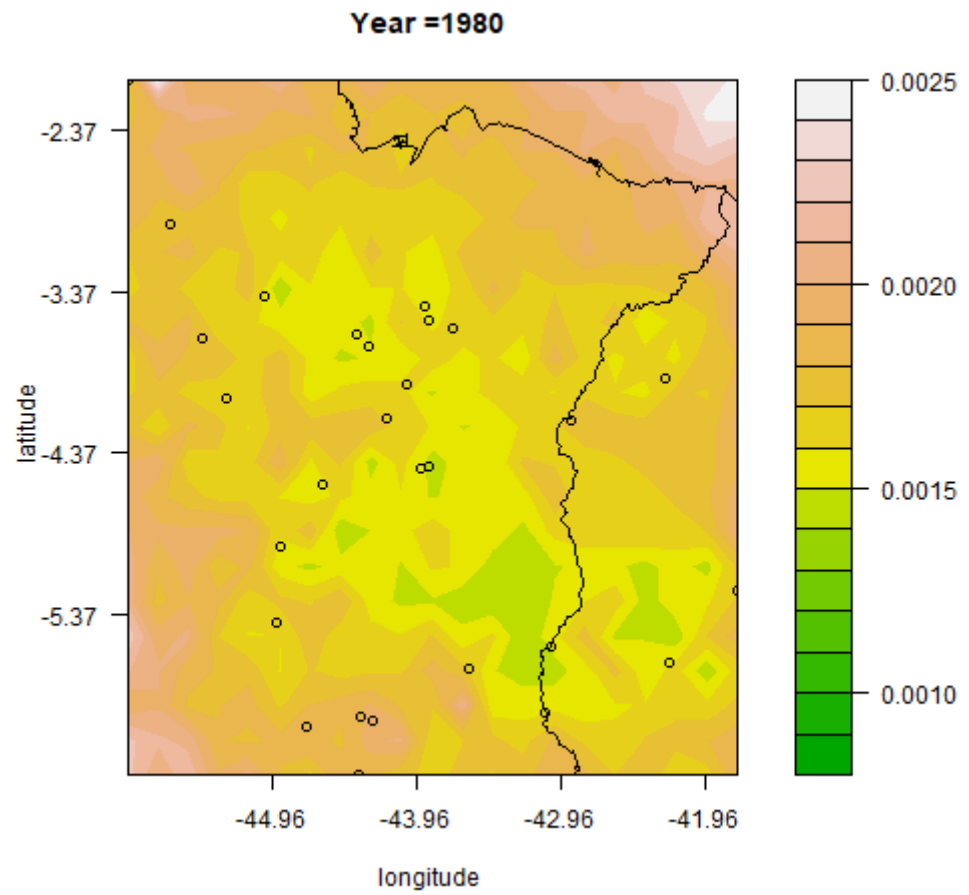

**Figure S19. SDNO95p.gif:** Animation of surface estimated for the standard deviation of  $R^*$  index in the NO subregion in the years 1980 to 2010.

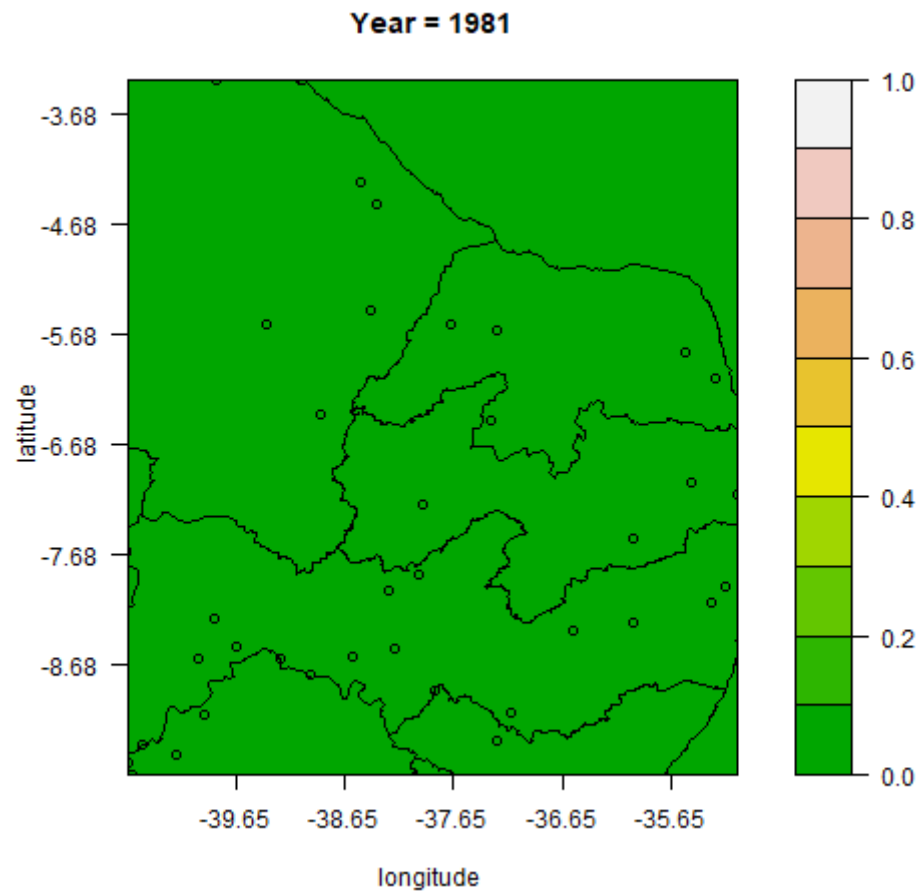

**Figure S20.** INTNO95p.gif: Hypothesis testing:  $H_0: R^*(s)=0.05$  against  $H_1: R^*(s) \neq 0.05$ , for any  $s$  in the subregion NO. Let  $I(s)=1$  if we reject  $H_0$  and  $I(s)=0$  in any other case. In this file, we show the animation of surface estimated for  $I$  in the NO subregion in the years 1980 to 2010.

### SS subregion

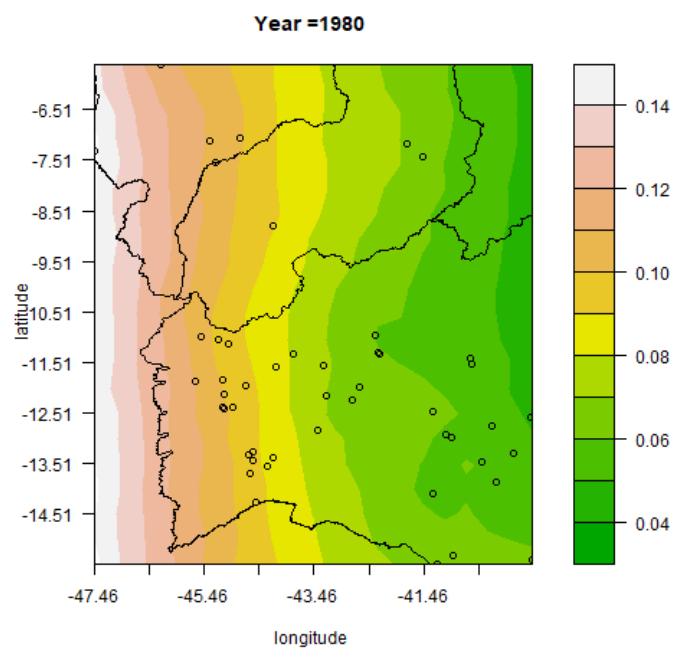

**Figure S21. meanSS10mm.gif:** Animation of surface estimated for R10mm index in the SS subregion in the years 1980 to 2010.

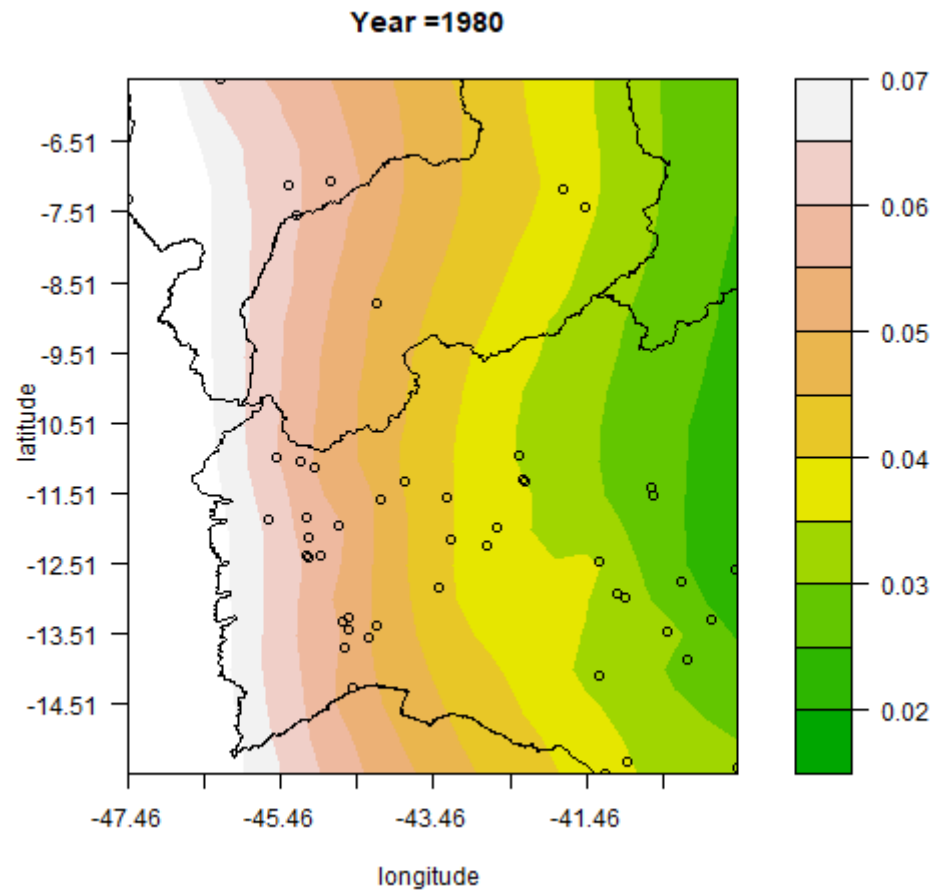

**Figure S22. meanSS20mm.gif:** Animation of surface estimated for R20mm index in the SS subregion in the years 1980 to 2010.

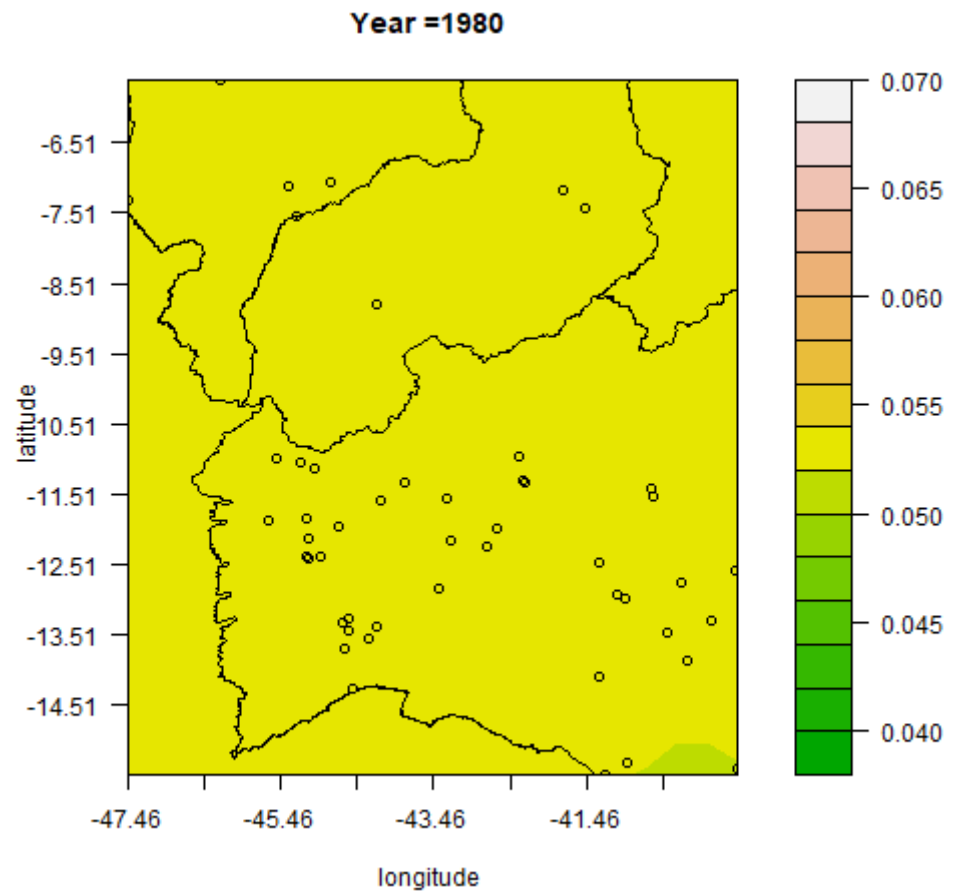

**Figure S23. meanSS95p.gif:** Animation of surface estimated for  $R^*$  index in the SS subregion in the years 1980 to 2010.

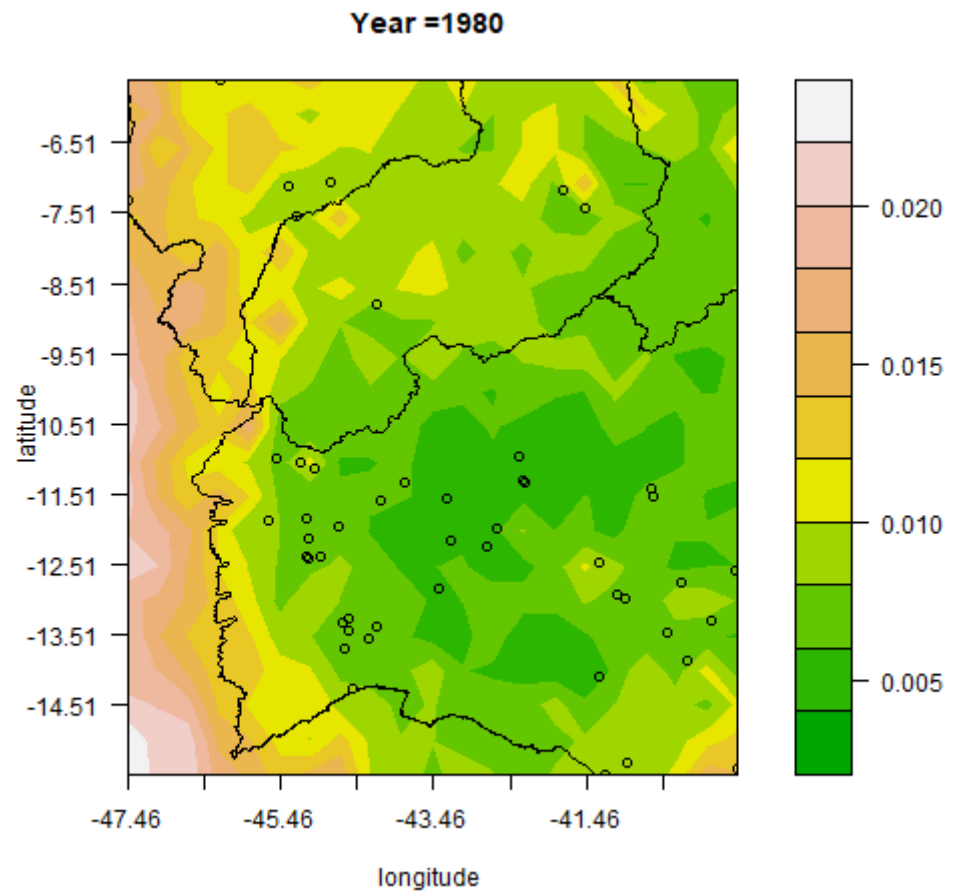

**Figure S24. SDSS10mm.gif:** Animation of surface estimated for the standard deviation of R10mm index in the SS subregion in the years 1980 to 2010.

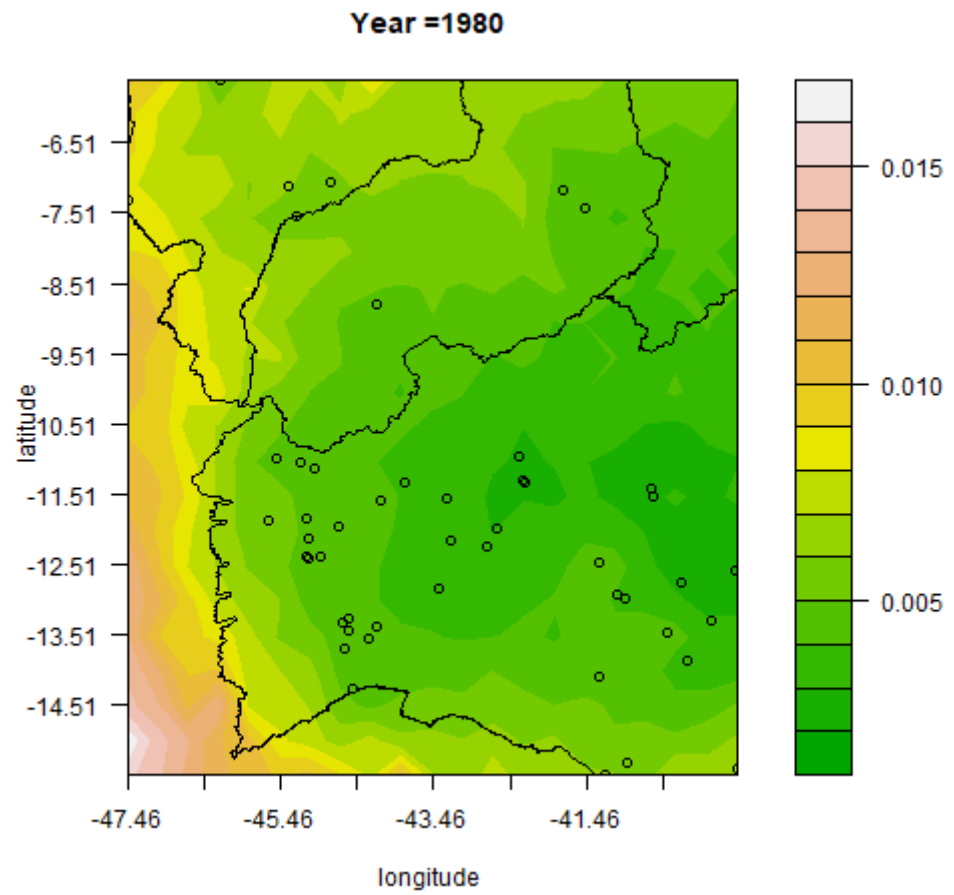

**Figure S25. SDSS20mm.gif:** Animation of surface estimated for the standard deviation of R20mm index in the SS subregion in the years 1980 to 2010.

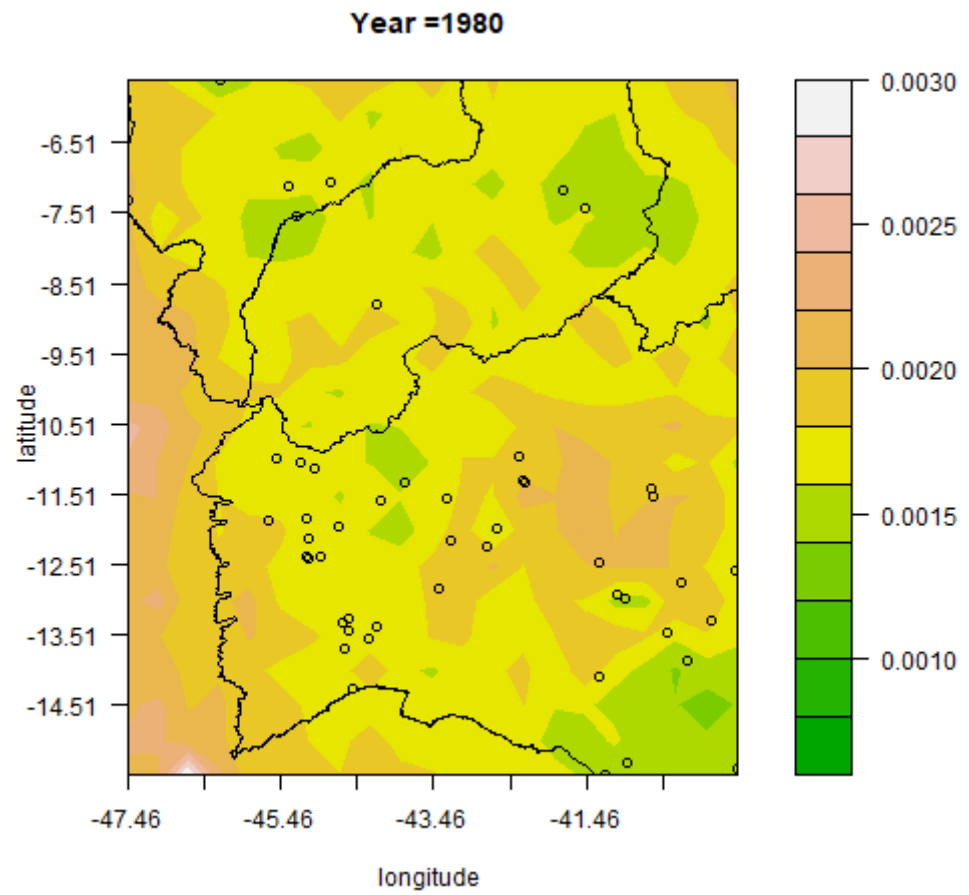

**Figure S26. SDSS95p.gif:** Animation of surface estimated for the standard deviation of  $R^*$  index in the SS subregion in the years 1980 to 2010.

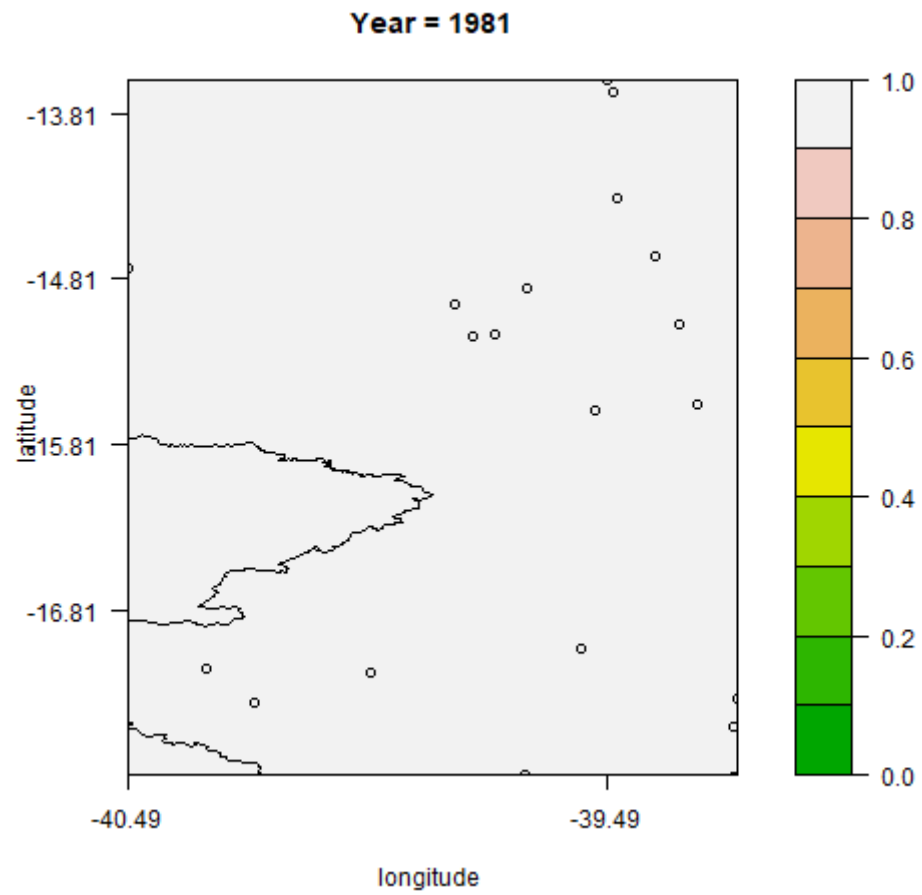

**Figure S27. INTSS95p.gif:** Hypothesis testing:  $H_0: R^*(s)=0.05$  against  $H_1: R^*(s) \neq 0.05$ , for any  $s$  in the subregion SS. Let  $I(s)=1$  if we reject  $H_0$  and  $I(s)=0$  in any other case. In this file, we show the animation of surface estimated for  $I$  in the SS subregion in the years 1980 to 2010.

**SC subregion**

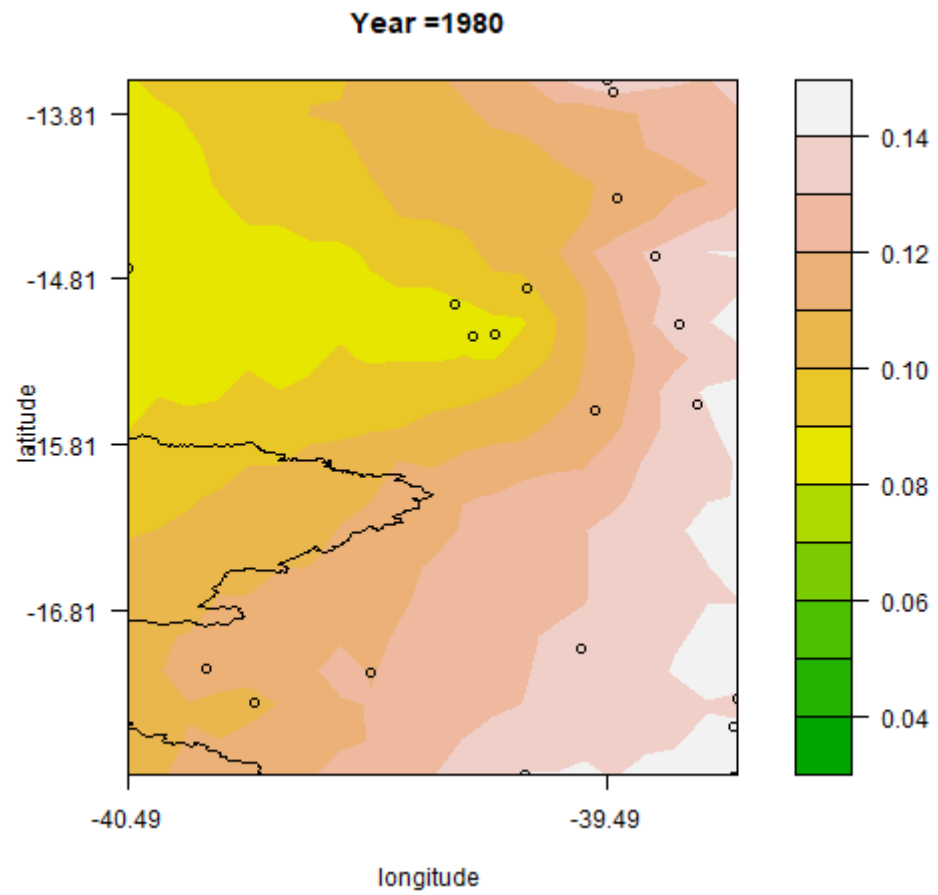

**Figure S28. meanSC10mm.gif:** Animation of surface estimated for R10mm index in the SC subregion in the years 1980 to 2010.

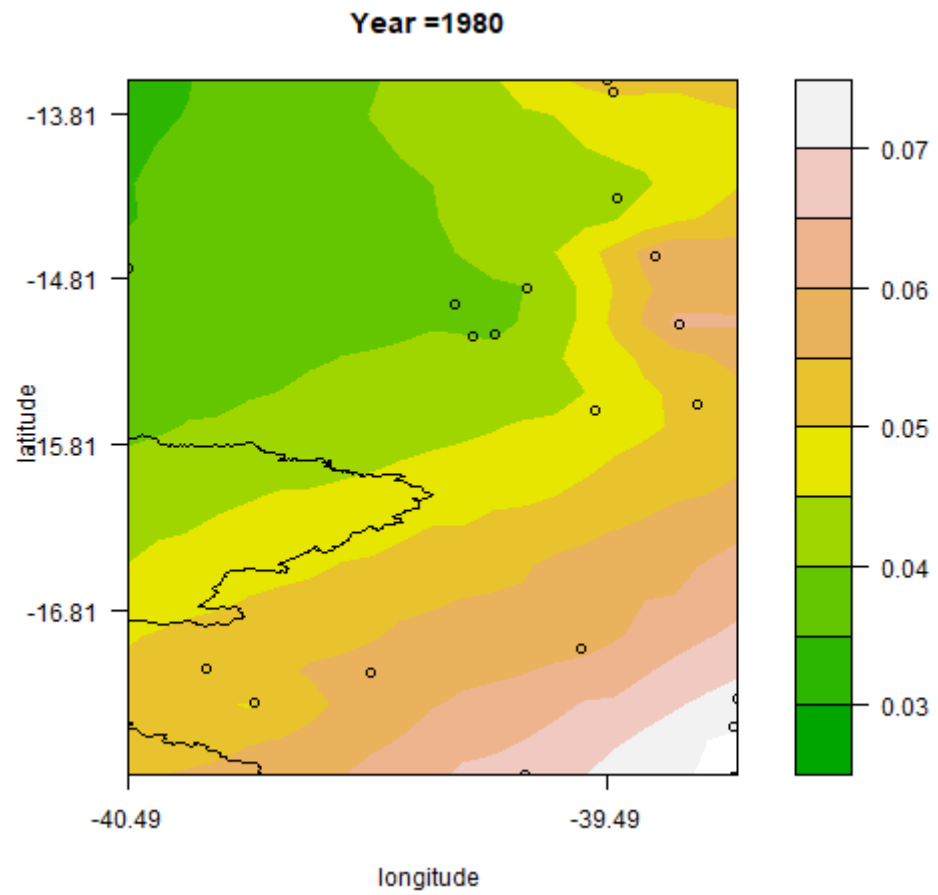

**Figure S29. meanSC20mm.gif:** Animation of surface estimated for R20mm index in the SC subregion in the years 1980 to 2010.

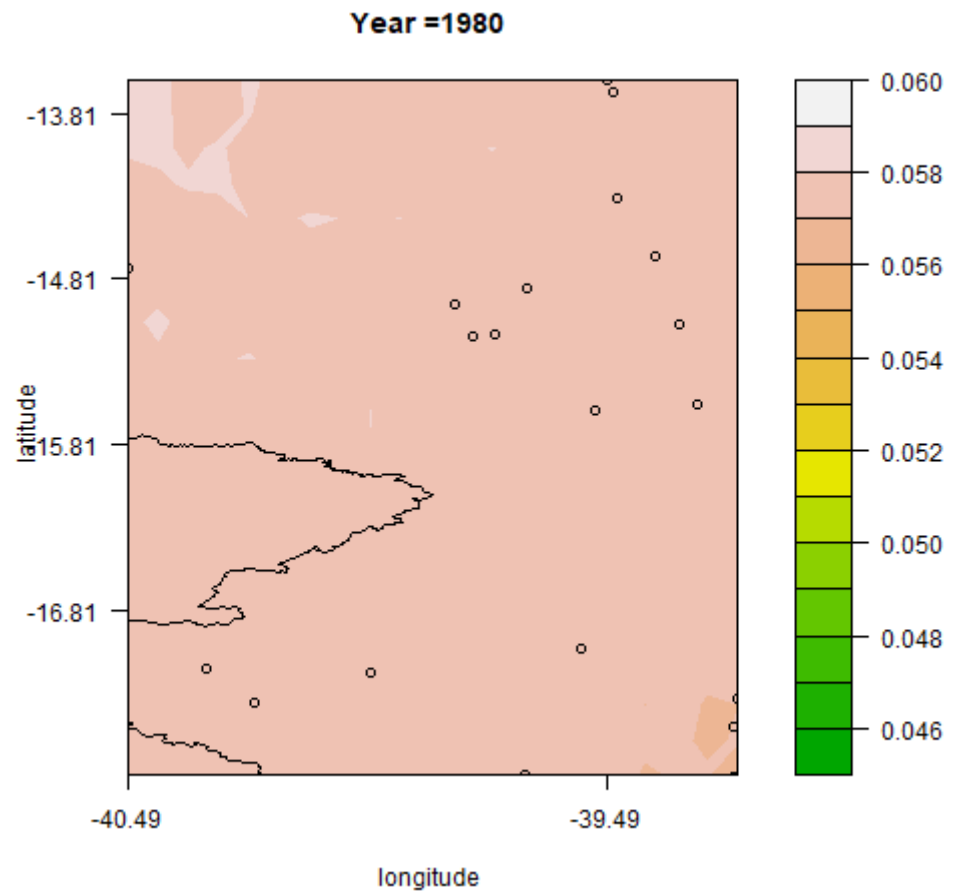

**Figure S30. meanSC95p.gif:** Animation of surface estimated for  $R$  index in the SC subregion in the years 1980 to 2010.



**Figure S31. SDSC10mm.gif:** Animation of surface estimated for the standard deviation of R10mm index in the SC subregion in the years 1980 to 2010.



**Figure S32. SDSC20mm.gif:** Animation of surface estimated for the standard deviation of R20mm index in the SC subregion in the years 1980 to 2010.



**Figure S33. SDSC95p.gif:** Animation of surface estimated for the standard deviation of  $R^*$  index in the SC subregion in the years 1980 to 2010.

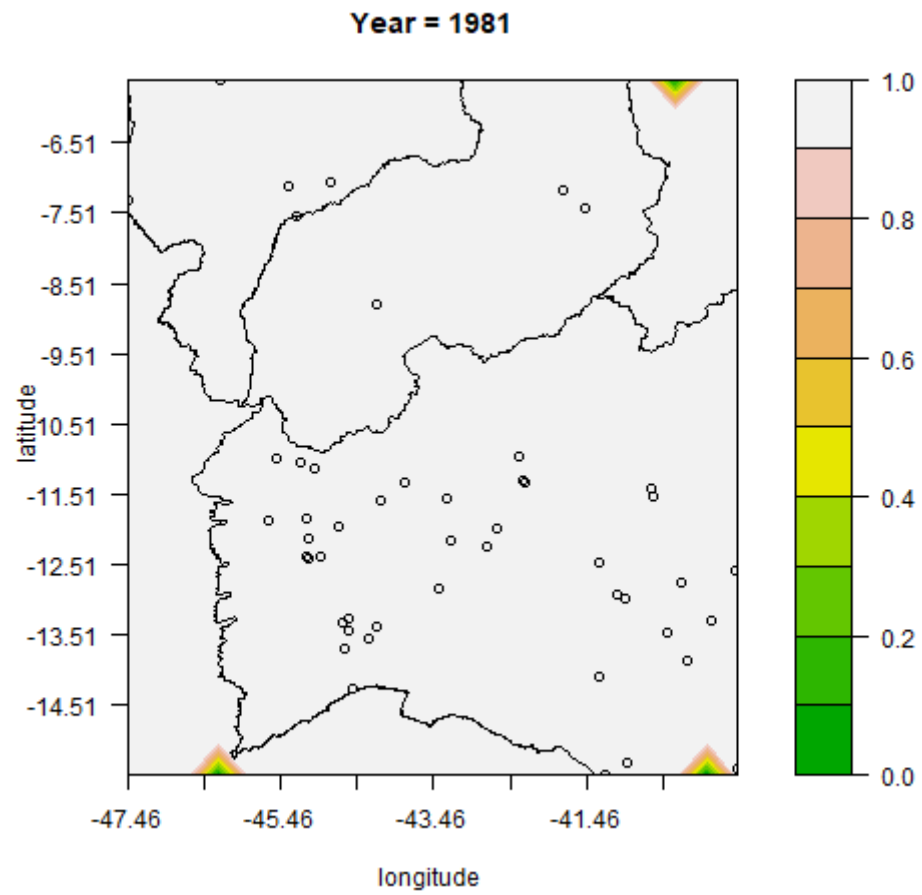

**Figure S34.** INTSC95p.gif: Hypothesis testing:  $H_0: R^*(s)=0.05$  against  $H_1: R^*(s) \neq 0.05$ , for any  $s$  in the subregion SC. Let  $I(s)=1$  if we reject  $H_0$  and  $I(s)=0$  in any other case. In this file, we show the animation of surface estimated for  $I$  in the SC subregion in the years 1980 to 2010.
